# Supplementary material
Source: PubMed Central journal article supplement (PMC5528695)
Supplement: MOL2-9-058-s001.pdf [file MOL2-9-058-s001.pdf]

## Supplementary Table S1: Datasets used in the study (n=40)

### Datasets used in the study:

| <b>Dataset *</b>     | <b>Data source</b>                                                                                                              | <b>Number of samples</b> | <b>Reference (PubMed link)</b>                                                                                              | <b>Ref.</b> |
|----------------------|---------------------------------------------------------------------------------------------------------------------------------|--------------------------|-----------------------------------------------------------------------------------------------------------------------------|-------------|
| Stockholm            | GSE1456                                                                                                                         | 159                      | <a href="http://www.ncbi.nlm.nih.gov/pubmed/16280042">http://www.ncbi.nlm.nih.gov/pubmed/16280042</a>                       | 1           |
| EORTC                | GSE1561                                                                                                                         | 49                       | <a href="http://www.ncbi.nlm.nih.gov/pubmed/15897907">http://www.ncbi.nlm.nih.gov/pubmed/15897907</a>                       | 2           |
| Rotterdam-EMC344     | GSE2034, GSE5327                                                                                                                | 344                      | <a href="http://www.ncbi.nlm.nih.gov/pubmed/15721472_17420468">http://www.ncbi.nlm.nih.gov/pubmed/15721472_17420468</a>     | 3,4         |
| expO                 | GSE2109                                                                                                                         | 301                      | <a href="http://www.intgen.org/expo/">http://www.intgen.org/expo/</a>                                                       |             |
| New York             | GSE2603                                                                                                                         | 99                       | <a href="http://www.ncbi.nlm.nih.gov/pubmed/16049480">http://www.ncbi.nlm.nih.gov/pubmed/16049480</a>                       | 5           |
| Oxford-Untreated     | GSE2990 (n=61), GSE6532 (n=8)                                                                                                   | 69                       | <a href="http://www.ncbi.nlm.nih.gov/pubmed/16478745">http://www.ncbi.nlm.nih.gov/pubmed/16478745</a>                       | 6           |
| Uppsala              | GSE3494 (n=251), GSE6232 (n=5), GSE4922 (n=1), GSE2990 (n=1)                                                                    | 258                      | <a href="http://www.ncbi.nlm.nih.gov/pubmed/16141321_2017079448">http://www.ncbi.nlm.nih.gov/pubmed/16141321_2017079448</a> | 7,8         |
| Boston               | GSE3744                                                                                                                         | 40                       | <a href="http://www.ncbi.nlm.nih.gov/pubmed/16473279">http://www.ncbi.nlm.nih.gov/pubmed/16473279</a>                       | 9           |
| Signapore            | GSE5364                                                                                                                         | 183                      | <a href="http://www.ncbi.nlm.nih.gov/pubmed/18636107">http://www.ncbi.nlm.nih.gov/pubmed/18636107</a>                       | 10          |
| Edinburgh            | GSE5462                                                                                                                         | 116                      | <a href="http://www.ncbi.nlm.nih.gov/pubmed/17885619">http://www.ncbi.nlm.nih.gov/pubmed/17885619</a>                       | 11          |
| London               | GSE6532                                                                                                                         | 87                       | <a href="http://www.ncbi.nlm.nih.gov/pubmed/17401012">http://www.ncbi.nlm.nih.gov/pubmed/17401012</a>                       | 12          |
| Oxford-Tamoxifen     | GSE6532                                                                                                                         | 109                      | <a href="http://www.ncbi.nlm.nih.gov/pubmed/16478745">http://www.ncbi.nlm.nih.gov/pubmed/16478745</a>                       | 6           |
| Berlin               | GSE6596                                                                                                                         | 24                       | <a href="http://www.ncbi.nlm.nih.gov/pubmed/17410534">http://www.ncbi.nlm.nih.gov/pubmed/17410534</a>                       | 13          |
| TransBIG             | GSE7390                                                                                                                         | 198                      | <a href="http://www.ncbi.nlm.nih.gov/pubmed/17545524">http://www.ncbi.nlm.nih.gov/pubmed/17545524</a>                       | 14          |
| London-2             | GSE9195                                                                                                                         | 77                       | <a href="http://www.ncbi.nlm.nih.gov/pubmed/18498629">http://www.ncbi.nlm.nih.gov/pubmed/18498629</a>                       | 15          |
| Tampa                | GSE10780                                                                                                                        | 39                       | <a href="http://www.ncbi.nlm.nih.gov/pubmed/19266279">http://www.ncbi.nlm.nih.gov/pubmed/19266279</a>                       | 16          |
| Mainz                | GSE11121                                                                                                                        | 200                      | <a href="http://www.ncbi.nlm.nih.gov/pubmed/18593943">http://www.ncbi.nlm.nih.gov/pubmed/18593943</a>                       | 17          |
| Veridex-Tam          | GSE12093                                                                                                                        | 136                      | <a href="http://www.ncbi.nlm.nih.gov/pubmed/18821012">http://www.ncbi.nlm.nih.gov/pubmed/18821012</a>                       | 18          |
| Rotterdam-EMC204     | GSE12276                                                                                                                        | 204                      | <a href="http://www.ncbi.nlm.nih.gov/pubmed/19421193">http://www.ncbi.nlm.nih.gov/pubmed/19421193</a>                       | 19          |
| Genentech            | GSE12763                                                                                                                        | 30                       | <a href="http://www.ncbi.nlm.nih.gov/pubmed/19567590">http://www.ncbi.nlm.nih.gov/pubmed/19567590</a>                       | 20          |
| Paris                | GSE13787                                                                                                                        | 23                       | <a href="http://www.ncbi.nlm.nih.gov/pubmed/19055754">http://www.ncbi.nlm.nih.gov/pubmed/19055754</a>                       | 21          |
| BIG1-98              | GSE16391                                                                                                                        | 55                       | <a href="http://www.ncbi.nlm.nih.gov/pubmed/19573224">http://www.ncbi.nlm.nih.gov/pubmed/19573224</a>                       | 14          |
| TOP                  | GSE16446                                                                                                                        | 120                      | <a href="http://www.ncbi.nlm.nih.gov/pubmed/21422418">http://www.ncbi.nlm.nih.gov/pubmed/21422418</a>                       | 22          |
| MDA100               | GSE16716                                                                                                                        | 100                      | <a href="http://www.ncbi.nlm.nih.gov/pubmed/20064235">http://www.ncbi.nlm.nih.gov/pubmed/20064235</a>                       | 23          |
| SET1                 | GSE17705                                                                                                                        | 103                      | <a href="http://www.ncbi.nlm.nih.gov/pubmed/20697068">http://www.ncbi.nlm.nih.gov/pubmed/20697068</a>                       | 24          |
| SET2                 | GSE17705                                                                                                                        | 195                      | <a href="http://www.ncbi.nlm.nih.gov/pubmed/20697068">http://www.ncbi.nlm.nih.gov/pubmed/20697068</a>                       | 24          |
| IPC_HER2             | GSE17907                                                                                                                        | 51                       | <a href="http://www.ncbi.nlm.nih.gov/pubmed/20932292">http://www.ncbi.nlm.nih.gov/pubmed/20932292</a>                       | 25          |
| Seattle              | GSE18728                                                                                                                        | 21                       | <a href="http://www.ncbi.nlm.nih.gov/pubmed/20012355">http://www.ncbi.nlm.nih.gov/pubmed/20012355</a>                       | 26          |
| Boston_Neo-Cisplatin | GSE18864                                                                                                                        | 84                       | <a href="http://www.ncbi.nlm.nih.gov/pubmed/20100965">http://www.ncbi.nlm.nih.gov/pubmed/20100965</a>                       | 27          |
| Boston_2             | GSE19615                                                                                                                        | 115                      | <a href="http://www.ncbi.nlm.nih.gov/pubmed/20098429">http://www.ncbi.nlm.nih.gov/pubmed/20098429</a>                       | 28          |
| StLouis              | GSE19697                                                                                                                        | 24                       | <a href="http://www.ncbi.nlm.nih.gov/pubmed/19967557">http://www.ncbi.nlm.nih.gov/pubmed/19967557</a>                       | 29          |
| Edinburgh            | GSE20181                                                                                                                        | 60                       | <a href="http://www.ncbi.nlm.nih.gov/pubmed/20697427">http://www.ncbi.nlm.nih.gov/pubmed/20697427</a>                       | 11          |
| MAQC_add_GSE20194    | GSE20194                                                                                                                        | 45                       | <a href="http://www.ncbi.nlm.nih.gov/pubmed/20676074">http://www.ncbi.nlm.nih.gov/pubmed/20676074</a>                       | 30          |
| MDA_139              | GSE20271 (n=139 additional to MDA133, GSE16716, and GSE20194)                                                                   | 139                      | <a href="http://www.ncbi.nlm.nih.gov/pubmed/20829329">http://www.ncbi.nlm.nih.gov/pubmed/20829329</a>                       | 31          |
| IPC                  | GSE21653                                                                                                                        | 266                      | <a href="http://www.ncbi.nlm.nih.gov/pubmed/20490655">http://www.ncbi.nlm.nih.gov/pubmed/20490655</a>                       | 32          |
| St-Cloud             | GSE22035                                                                                                                        | 43                       | <a href="http://www.ncbi.nlm.nih.gov/pubmed/21209903">http://www.ncbi.nlm.nih.gov/pubmed/21209903</a>                       | 33          |
| Nashville            | GSE22513                                                                                                                        | 28                       | <a href="http://www.ncbi.nlm.nih.gov/pubmed/20068102">http://www.ncbi.nlm.nih.gov/pubmed/20068102</a>                       | 34          |
| San Francisco        | <a href="http://www.ebi.ac.uk/arrayexpress/experiments/E-TABM-158">http://www.ebi.ac.uk/arrayexpress/experiments/E-TABM-158</a> | 118                      | <a href="http://www.ncbi.nlm.nih.gov/pubmed/17157792">http://www.ncbi.nlm.nih.gov/pubmed/17157792</a>                       | 35          |
| Neo-Trastuzumab      | <a href="https://array.nci.nih.gov/caarray/project/harri-00137">https://array.nci.nih.gov/caarray/project/harri-00137</a>       | 22                       | <a href="http://www.ncbi.nlm.nih.gov/pubmed/17317830">http://www.ncbi.nlm.nih.gov/pubmed/17317830</a>                       | 36          |
| MDA133               | <a href="http://bioinformatics.mdanderson.org/pubdata.html">http://bioinformatics.mdanderson.org/pubdata.html</a>               | 133                      | <a href="http://www.ncbi.nlm.nih.gov/pubmed/16896004">http://www.ncbi.nlm.nih.gov/pubmed/16896004</a>                       | 37          |
| <b>TOTAL:</b>        |                                                                                                                                 | <b>4467</b>              |                                                                                                                             |             |

**\* Remarks:** The complete *TransBIG* dataset contains independent replicate samples from 19 patients of the *Uppsala* cohort and 22 patients of the *Oxford-Untreated* cohort. Datasets "*MAQC\_add\_GSE20194*" and "*MDA\_139*" contain only the subsets of 45 and 139 nonredundant samples from the GEO series GSE20194 and GSE20271, respectively, which are not already covered by the *MDA133* and *MDA100* datasets.

## References to Supplementary Table S1

1. Pawitan, Y. *et al.* Gene expression profiling spares early breast cancer patients from adjuvant therapy: derived and validated in two population-based cohorts. *Breast Cancer Res* **7**, R953-64 (2005).
2. Farmer, P. *et al.* Identification of molecular apocrine breast tumours by microarray analysis. *Oncogene* **24**, 4660-4671 (2005).
3. Wang, Y. *et al.* Gene-expression profiles to predict distant metastasis of lymph-node-negative primary breast cancer. *Lancet* **365**, 671-679 (2005).
4. Minn, A. J. *et al.* Genes that mediate breast cancer metastasis to lung. *Nature* **436**, 518-524 (2005).
5. Minn, A. J. *et al.* Lung metastasis genes couple breast tumor size and metastatic spread. *Proc Natl Acad Sci U S A* **104**, 6740-6745 (2007).
6. Sotiriou, C. *et al.* Gene expression profiling in breast cancer: understanding the molecular basis of histologic grade to improve prognosis. *J Natl Cancer Inst* **98**, 262-272 (2006).
7. Miller, L. D. *et al.* An expression signature for p53 status in human breast cancer predicts mutation status, transcriptional effects, and patient survival. *Proc Natl Acad Sci U S A* **102**, 13550-13555 (2005).
8. Ivshina, A. V. *et al.* Genetic reclassification of histologic grade delineates new clinical subtypes of breast cancer. *Cancer Res* **66**, 10292-10301 (2006).
9. Richardson, A. L. *et al.* X chromosomal abnormalities in basal-like human breast cancer. *Cancer Cell* **9**, 121-132 (2006).
10. Yu, K. *et al.* A precisely regulated gene expression cassette potentially modulates metastasis and survival in multiple solid cancers. *PLoS Genet* **4**, e1000129 (2008).
11. Miller, W. R., Larionov, A., Anderson, T. J., Evans, D. B. & Dixon, J. M. Sequential changes in gene expression profiles in breast cancers during treatment with the aromatase inhibitor, letrozole. *Pharmacogenomics J* **12**, 10-21 (2012).
12. Loi, S. *et al.* Definition of clinically distinct molecular subtypes in estrogen receptor-positive breast carcinomas through genomic grade. *J Clin Oncol* **25**, 1239-1246 (2007).
13. Klein, A. *et al.* Comparison of gene expression data from human and mouse breast cancers: identification of a conserved breast tumor gene set. *Int J Cancer* **121**, 683-688 (2007).
14. Desmedt, C. *et al.* The Gene expression Grade Index: a potential predictor of relapse for endocrine-treated breast cancer patients in the BIG 1-98 trial. *BMC Med Genomics* **2**, 40 (2009).
15. Loi, S. *et al.* Predicting prognosis using molecular profiling in estrogen receptor-positive breast cancer treated with tamoxifen. *BMC Genomics* **9**, 239 (2008).
16. Chen, D.-T. *et al.* Proliferative genes dominate malignancy-risk gene signature in histologically-normal breast tissue. *Breast Cancer Res Treat* **119**, 335-346 (2010).
17. Schmidt, M. *et al.* The humoral immune system has a key prognostic impact in node-negative breast cancer. *Cancer Res* **68**, 5405-5413 (2008).
18. Zhang, Y. *et al.* The 76-gene signature defines high-risk patients that benefit from adjuvant tamoxifen therapy. *Breast Cancer Res Treat* **116**, 303-309 (2009).
19. Bos, P. D. *et al.* Genes that mediate breast cancer metastasis to the brain. *Nature* **459**, 1005-1009 (2009).
20. Hoeflich, K. P. *et al.* In vivo antitumor activity of MEK and phosphatidylinositol 3-kinase inhibitors in basal-like breast cancer models. *Clin Cancer Res* **15**, 4649-4664 (2009).
21. Marty, B. *et al.* Frequent PTEN genomic alterations and activated phosphatidylinositol 3-kinase pathway in basal-like breast cancer cells. *Breast Cancer Res* **10**, R101 (2008).
22. Desmedt, C. *et al.* Multifactorial approach to predicting resistance to anthracyclines. *J Clin Oncol* **29**, 1578-1586 (2011).
23. Popovici, V. *et al.* Effect of training-sample size and classification difficulty on the accuracy of genomic predictors. *Breast Cancer Res* **12**, R5 (2010).
24. Symmans, W. F. *et al.* Genomic index of sensitivity to endocrine therapy for breast cancer. *J Clin Oncol* **28**, 4111-4119 (2010).
25. Sircoulomb, F. *et al.* Genome profiling of ERBB2-amplified breast cancers. *BMC Cancer* **10**, 539 (2010).
26. Korde, L. A. *et al.* Gene expression pathway analysis to predict response to neoadjuvant docetaxel and capecitabine for breast cancer. *Breast Cancer Res Treat* **119**, 685-699 (2010).
27. Silver, D. P. *et al.* Efficacy of neoadjuvant Cisplatin in triple-negative breast cancer. *J Clin Oncol* **28**, 1145-1153 (2010).
28. Li, Y. *et al.* Amplification of LPTM4B and YWHAZ contributes to chemotherapy resistance and recurrence of breast cancer. *Nat Med* **16**, 214-218 (2010).
29. Lin, Y. *et al.* A gene expression signature that predicts the therapeutic response of the basal-like breast cancer to neoadjuvant chemotherapy. *Breast Cancer Res Treat* **123**, 691-699 (2010).
30. Shi, L. *et al.* The MicroArray Quality Control (MAQC)-II study of common practices for the development and validation of microarray-based predictive models. *Nat Biotechnol* **28**, 827-838 (2010).
31. Tabchy, A. *et al.* Evaluation of a 30-gene paclitaxel, fluorouracil, doxorubicin, and cyclophosphamide chemotherapy response predictor in a multicenter randomized trial in breast cancer. *Clin Cancer Res* **16**, 5351-5361 (2010).
32. Sabatier, R. *et al.* A gene expression signature identifies two prognostic subgroups of basal breast cancer. *Breast Cancer Res. Treat.* **126**, 407-420 (2011).
33. Cizkova, M. *et al.* Gene expression profiling reveals new aspects of PIK3CA mutation in ERalpha-positive breast cancer: major implication of the Wnt signaling pathway. *PLoS ONE* **5**, e15647 (2010).
34. Bauer, J. A. *et al.* Identification of markers of taxane sensitivity using proteomic and genomic analyses of breast tumors from patients receiving neoadjuvant paclitaxel and radiation. *Clin Cancer Res* **16**, 681-690 (2010).
35. Chin, K. *et al.* Genomic and transcriptional aberrations linked to breast cancer pathophysiology. *Cancer Cell* **10**, 529-541 (2006).

36. Harris, L. N. *et al.* Predictors of resistance to preoperative trastuzumab and vinorelbine for HER2-positive early breast cancer. *Clin Cancer Res* **13**, 1198–1207 (2007).
37. Hess, K. R. *et al.* Pharmacogenomic predictor of sensitivity to preoperative chemotherapy with paclitaxel and fluorouracil, doxorubicin, and cyclophosphamide in breast cancer. *J Clin Oncol* **24**, 4236–4244 (2006).

**Supplementary Table S3: Multivariate Cox regression analysis of survival according to ASAH1 expression and standard parameters**

| Parameter                           | Numbers <sup>a</sup> | HR   | 95% CI    | P-Value <sup>b</sup> |
|-------------------------------------|----------------------|------|-----------|----------------------|
| ASAH1 (High vs. Low)                | 107 vs. 763          | 0.68 | 0.46-1.02 | 0.063                |
| ER (positive vs. negative)          | 518 vs. 352          | 1.31 | 0.99-1.73 | 0.063                |
| PgR (positive vs. negative)         | 467 vs. 403          | 0.68 | 0.53-0.89 | <b>0.005</b>         |
| HER2 (positive vs. negative)        | 142 vs. 728          | 1.06 | 0.77-1.45 | 0.73                 |
| Lymph node status (LNN vs. N+)      | 662 vs. 208          | 0.81 | 0.61-1.07 | 0.14                 |
| Age (>50 vs. ≤50)                   | 466 vs. 404          | 1.09 | 0.86-1.37 | 0.50                 |
| tumor size (≤1cm vs. >1cm)          | 238 vs. 632          | 0.87 | 0.66-1-14 | 0.30                 |
| Histological grading (G3 vs. G1&G2) | 484 vs. 386          | 1.11 | 0.87-1.42 | 0.39                 |

<sup>a</sup> For 870 of the 2590 samples with follow up data information on all eight parameters was available.

<sup>b</sup> Significant P-Values are given in bold.
