# Supplementary material
Source: PubMed Central journal article supplement (PMC5528695)

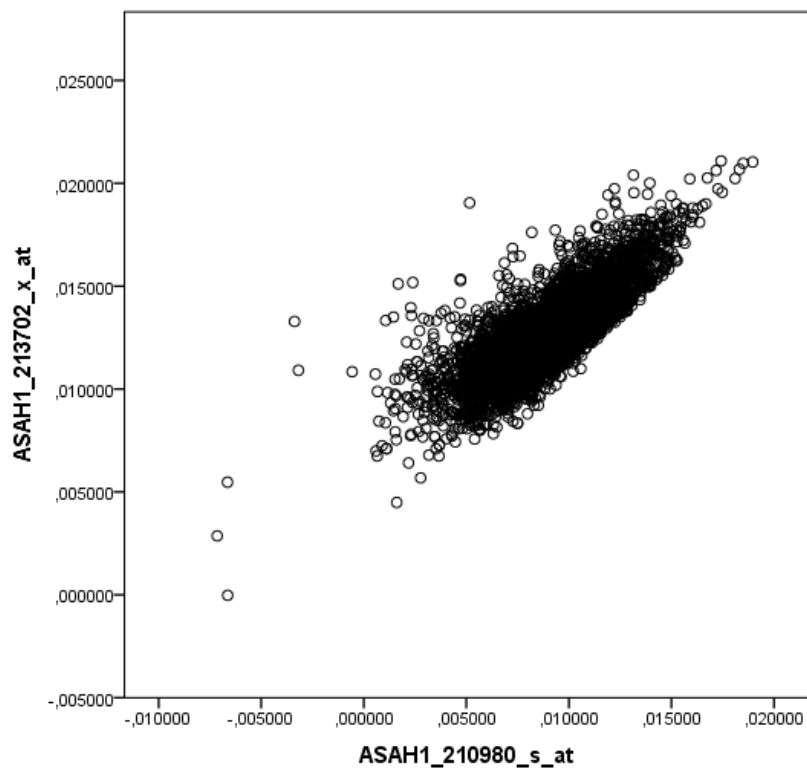

Supplementary Figure S1

Supplement: MOL2-9-058-s002.pdf [file MOL2-9-058-s002.pdf]
